1     **Financial Feasibility Study and policy recommendations of Incremental Modified Drugs**  
2                     **Development by the Domestic Pharmaceutical Industry**

3     Manthana Laichapis<sup>1,2¶</sup>, Rungpetch Sakulbumrungsil<sup>1\*</sup>, Khunjira Udomaksorn<sup>2¶</sup>, Nusaraporn  
4     Kessomboon<sup>3¶</sup>, Osot Nerapusee<sup>1&</sup>, Charkkrit Hongthong<sup>3&</sup>, Sitanun Poonpolsub<sup>4&</sup>

5

6

7

8     <sup>1</sup> Department of Social and Administrative Pharmacy, Faculty of Pharmaceutical Sciences,  
9     Chulalongkorn University, Thailand, Bangkok

10

11    <sup>2</sup> Department of Social and Administrative Pharmacy, Faculty of Pharmaceutical Sciences,  
12    Prince of Songkla University Thailand, Songkhla

13

14    <sup>3</sup> Department of Social and Administrative Pharmacy, Faculty of Pharmaceutical Sciences, Khon  
15    Kaen University, Thailand, Khon Kaen

16

17    <sup>4</sup> Food and Drug Administration Thailand, Thailand, Nonthaburi

18

19    \*Corresponding author

20    Email: [rungpetch.c@chula.ac.th](mailto:rungpetch.c@chula.ac.th) (RS)

21    <sup>¶</sup>These authors contributed equally to this work

22    <sup>&</sup>These authors also contributed equally to this work.

23

24

## 25 **Abstract**

26           The Thai pharmaceutical industry aims to strengthen its drug system in accordance with  
27 the National Strategic Master Plan, emphasizing sustainable development, particularly in  
28 biologics and herbal products, to achieve self-reliance. Current efforts are mainly focused on  
29 generic drug production, but there's a significant need for Research and Development (R&D) in  
30 Innovative Medicines (IMDs). This study explores the financial feasibility of locally developing  
31 an IMDs dosage form. To assess this feasibility, a mixed-methods approach was used,  
32 incorporating a literature review, surveys, and interviews. This process involved selecting types  
33 of IMDs, constructing financial models, determining cost structures, and conducting a thorough  
34 feasibility analysis. The results indicated that a sustained-release dosage form was the most  
35 viable option. The analysis took into account total development costs, payback periods, growth  
36 rates, and the revenue required to recoup investments. It was found that IMD development is  
37 associated with higher costs and longer durations compared to new generic drugs. The study  
38 identified several challenges, such as the high cost of clinical studies, extended development  
39 times, market feasibility, and drug selection difficulties. Policy recommendations were made to  
40 address these challenges, including incentives for clinical studies and fostering industry expertise  
41 through collaborative efforts and supportive government policies. In conclusion, the financial  
42 feasibility of developing IMDs requires strategic policies and collaboration to overcome these  
43 challenges and ensure sustainability. The findings of this study are intended to aid stakeholders  
44 in making informed R&D investment decisions.

45

46

## 47 **Introduction**

48           The Thai pharmaceutical industry has focused on development in accordance with the  
49 National Strategic Master Plan (2018-2037), specifically targeting the enhancement of the  
50 national drug system and the potential growth of pharmaceutical manufacturing within the  
51 country (1), The third national drug policy of 2011 and the national drug system development  
52 strategy for 2011-2016 have emphasized the sustainable development of the pharmaceutical  
53 industry, including biologics and herbal products to achieve self-reliance (2). The primary  
54 objectives include the acceleration of capabilities and the elevation of the pharmaceutical  
55 industry through research, development, and production of vaccines, drugs, and biologics.  
56 Moreover, promoting local pharmaceutical industries and services is crucial to reduce imports  
57 and increase exports.

58           Currently, the Thai pharmaceutical manufacturing industry predominantly focuses on the  
59 production of generic drugs, with an average annual approval of 540 generic drugs as well as  
60 new generic drugs (averaging 35 approvals per year). However, the number of new drug  
61 formulations developed and approved in Thailand remains relatively small, largely because of  
62 the unpreparedness of the pharmaceutical manufacturing industry and relevant regulatory  
63 agencies, and the lack of explicit guidelines for the registration of new drugs produced in the  
64 country. Research and development (R&D) efforts have become more focused, with the Food  
65 and Drug Administration (FDA Thailand) defining seven types of new drugs: 1. New chemical  
66 entities (NCEs), 2. New indications, 3. New combinations, 4. New delivery systems, 5. New  
67 routes of administration, 6. New dosage forms, and 7. New strengths. Types 2-7, often referred  
68 to as incrementally modified drugs or IMDs in many countries. Among these, NCEs require  
69 significant investments, technology, and personnel, and Thailand currently lacks sufficient

70 capacity. Over the past decade, pharmaceutical manufacturing companies have invested in R&D  
71 and adopted new technologies to develop different forms of finished products (3).

72 To support the pharmaceutical manufacturing industry, it is imperative to conduct R&D  
73 on incrementally modified drugs (IMDs) that possess compounds and efficacies similar to the  
74 original drugs but exhibit modified properties and characteristics. This can be achieved through  
75 the use of advanced technology platforms to promote sustainable self-reliance in the Thai  
76 pharmaceutical industry. Consequently, this study aims to explore the financial feasibility of  
77 developing a dosage form for IMDs in the local pharmaceutical manufacturing industry. Thus, it  
78 provides an investment proposal to support policymaking and investment decision-making from  
79 an industrial perspective.

## 80 **Method**

81 The present study employed a mixed-methods approach, incorporating literature review,  
82 surveys, and interviews as the qualitative part, to explore the construct of financial analysis,  
83 which constitutes the quantitative part.

### 84 **Literature review**

85 The literature review conducted to examine the different dosage forms used in the  
86 production of existing IMDs, as well as the manufacturing processes involved in IMDs, from the  
87 upstream process to the downstream process. Data for the model was collected through the  
88 literature review and related documents to assess the situation and ability to manufacture IMDs  
89 in Thailand. An interview instrument was developed to interview relevant experts.

### 90 **Survey**

91 The survey method was used to identify and estimate costs based on the defined cost  
92 structures, which were derived from the 'Impact of Thai-EU Free Trade Agreement (FTA)  
93 concerning Intellectual Property Rights on the Pharmaceutical Supply Chain in Thailand' study  
94 (Liangrokapart et al., 2013)

95 1. The collection forms with pre-defined cost structures were sent to 5 IMDs (Industrial  
96 Manufacturing and Development) experts.

97 2. The experts provided estimated costs and comments to make the cost structure more  
98 valid.

## 99 **Interview**

100 The interview process involved selecting experts and individuals with expertise in  
101 assessing the situation and ability to manufacture IMDs in Thailand. The recruitment period for  
102 the study spanned from August 5, 2021, to August 4, 2022. This period indicates the timeframe  
103 during which participants were actively recruited and enrolled in the study.

### 104 A.) Demographic of informants

105 The sampling method employed for this study was the snowball sampling  
106 technique until data saturation was reached. Participants were recruited from 15 local  
107 pharmaceutical industry companies, of which 5 were company owners, and the remaining  
108 participants were individuals associated with IMDs development.

### 109 B.) Interview process:

110 1. The researcher sent interview questions to research participants and schedule individual  
111 online interviews. Each interview is expected to take approximately 1 hour. The  
112 researcher sought permission from participants to record the interview for data analysis  
113 purposes (audio recordings will be destroyed at the end of the project).

114 2. Participants' agreement to participate in the research and their decision to participate in  
115 the online interview were considered as consent. Participants were not required to sign a  
116 letter of consent.

117 3. Participants who complete an online interview received remuneration of 1,000 baht per  
118 person.

119 C.) Question guidelines:

120 1. What are the costs associated with the research and development of a dosage form for  
121 IMDs?

122 2. What are the procedures involved in the research and development of a dosage form for  
123 IMDs, and what are the associated costs?

124 3. What are the costs related to manufacturing technology?

125 4. What are the costs of conducting clinical and non-clinical studies?

126 The present study employed a mixed-methods approach, incorporating literature review,  
127 surveys, and interviews as the qualitative part, to explore the construct of financial analysis,  
128 which constitutes the quantitative part. The methodology was adapted to perform the  
129 following steps:

130 **1. Selection of IMD types**

131 Sustained release, first modified dosage form, and most preferable types of IMDs  
132 were identified based on the results of a feasibility study of incrementally modified drugs  
133 developed by the domestic pharmaceutical industry (4, 5).

134 **2. Development of financial models**

135 Suitable investment models were developed to align the specific circumstances  
136 and capabilities of the local pharmaceutical industries.

### 137 **3. Identification of cost structure and cost estimation**

138 The cost structure was determined, and the costs associated with the  
139 manufacturing industry's investment in IMDs were estimated. A cost structure adapted  
140 from a study on the Impact of the Thai-EU Free Trade Agreement (FTA) concerning  
141 Intellectual Property Rights on the Pharmaceutical Supply Chain in Thailand was applied.  
142 This structure encompasses sourcing, R&D at the lab scale, pilot batch and stability  
143 studies, non-clinical trials, clinical trials, registration, and process validation batch stages  
144 (6). Costs were estimated based on each step of the drug development process until the  
145 drug was launched in the market (7, 8).

### 146 **4. Financial feasibility analysis of IMDs**

147 Assumptions were set, and data related to investment variables were collected to  
148 analyse the financial feasibility of IMDs. Sensitivity analysis was conducted to evaluate  
149 the impact of variations in cost, duration, and payback period. Additionally, the cost was  
150 estimated based on two scenarios, considering the regulatory requirements of IMDs (9).  
151 The first scenario involved conducting only Phase I (scenario 1), whereas the second  
152 involved conducting a full clinical trial (scenario 2).

## 153 **Results**

154 Based on a prediction market analysis conducted during a feasibility study of IMDs  
155 development by the domestic pharmaceutical industry, the sustained-release dosage form  
156 emerged as the most preferable option (4). Consequently, the financial feasibility of this  
157 particular dosage form was analysed, considering the input data and assumptions outlined in  
158 Table 1.

159 **Table 1** Input data and assumptions for financial model and financial feasibility study

|                         | Details                                                       | Source of data                    |
|-------------------------|---------------------------------------------------------------|-----------------------------------|
| Cost of sales           | 25% of revenues                                               | Literature review (12)            |
| Operational expense     | 40% of revenues                                               | Literature review (12), interview |
| Discounted rate         | Discount rate 3%                                              | Literature review (13)            |
| Interested rate         | Interest rate for business is 3%                              | Interview                         |
| Tax rate                | Corporate tax rate is 20%                                     | Literature review (14), interview |
| Expected payback period | Payback period that investors could be accepted is 5-10 years | Interview                         |

160

## 161 **Model for financial feasibility analysis**

162 This study utilizes a distinct financial viability analysis model that allows investors to  
163 determine the payback period and market growth rate based on a business's capacity and  
164 provides valuable information for assessing the financial feasibility of investing in  
165 pharmaceutical R&D. The model encompasses two main components: a cost model for  
166 researching and developing the drug dosage form and a sales revenue model that calculates the  
167 necessary income for capital return within the specified payback period. It offers flexibility for  
168 investors to adjust variables, such as the payback period and market growth rate, aiding in the  
169 decision-making process for selecting and developing study drugs.

## 170 **Financial feasibility analysis of sustained release dosage form**

171 Based on the information presented in Table 2, the R&D process for new  
172 sustained-release forms of IMDs was found to take approximately 7 years for conducting only  
173 Phase 1 clinical studies, and 11 years for the full clinical trial. By comparison, the development



174 of new generic drugs typically ranges from 25 to 46 months.(6) The longer duration in the case  
175 of sustained-release forms of IMDs can be attributed to the development of new formulations,  
176 higher failure rates, increased complexity of analysis, and the inclusion of clinical studies  
177 involving a new drug.

178 The development of new sustained-release drugs from existing chemical entities for  
179 conducting only Phase I incurs fixed costs ranging from 1.46 to 3.09 million USD. In  
180 comparison, the cost of developing new generic drugs ranges from 0.19 to 1.13 million USD(6).  
181 Higher costs associated with sustained-release drugs can be attributed to these factors. A  
182 significant portion of the drug development costs in this scenario was allocated to process  
183 validation batches, accounting for approximately 60% of the total R&D cost. This final step  
184 before commercialization requires three consecutive production cycles, leading to substantial  
185 capital requirements that can vary based on the complexity and ease of production.

186 In scenario with full clinical trial, which involves studying the drug from Phase 1 to  
187 Phase 3 clinical trials to establish efficacy and safety, the fixed costs for new drug development  
188 range from 18.60 to 20.23 million USD. Most of the cost and time in this scenario are allocated  
189 to clinical trial studies, constituting approximately 70% of the total cost. Clinical trials are crucial  
190 to prove the efficacy and safety of new drugs. Specific processes, sample sizes, and drug types  
191 can influence R&D costs.

192 **Table 2** The process and cost of developing IMDs in the form of a sustained release by the domestic pharmaceutical industry.

| <b>Process</b>           | <b>Details<br/>(6)</b>                                                                                                                                                                                          | <b>Scenario 1<br/>(Million USD)</b> | <b>Scenario 2<br/>(Million USD)</b> | <b>Information Source</b>                |
|--------------------------|-----------------------------------------------------------------------------------------------------------------------------------------------------------------------------------------------------------------|-------------------------------------|-------------------------------------|------------------------------------------|
| <b>Sourcing</b>          | Local manufacturers choose IMD reference drugs based on marketing, user needs, sales, patents, and suitability.                                                                                                 | 0.02                                | 0.02                                | Interview                                |
| <b>R&amp;D lab scale</b> | The R&D department conducts lab-scale studies to develop suitable formulations for sustained release drugs, including analytical method development and determination of finished product specifications (FPS). | 0.06-0.15                           | 0.06-0.15                           | Interview                                |
| <b>Pilot scale</b>       | After successful drug R&D, pilot batch production begins, followed by stability studies to determine shelf-life specifications. Results are reported to FDA.                                                    | 0.27-0.66                           | 0.27-0.66                           | Interview                                |
| <b>Clinical study</b>    |                                                                                                                                                                                                                 |                                     |                                     |                                          |
| <b>-Phase I</b>          | Samples from the pilot batches production will be sent to study the effect of food on bio-efficacy through bioequivalence study and evaluating the effect of alcohol on dose dumping.                           | 0.29                                | 0.29                                | Literature review<br>,Interview,(9),(15) |
| <b>-Phase II</b>         | In case the pharmacokinetics of a new drug are clinically significant different from the reference drug, Phase II and III studies of the new drug may be necessary.                                             | -                                   | 4.29                                | Literature review<br>,Interview,(9)      |
| <b>-Phase III</b>        |                                                                                                                                                                                                                 | -                                   | 12.86                               |                                          |

|                                 |                                                                                                                                                                                                                                                                        |           |             |           |
|---------------------------------|------------------------------------------------------------------------------------------------------------------------------------------------------------------------------------------------------------------------------------------------------------------------|-----------|-------------|-----------|
| <b>Registration</b>             | Registration of new drug formulas follows ASEAN Harmonization criteria. Application documents include administration data, product information, quality, safety, and efficacy parts. Non-clinical and clinical study data can refer to recommendations and guidelines. | 0.003     | 0.003       | Interview |
| <b>Process validation batch</b> | After obtaining FDA registration, drugs can be produced in commercial batches. Process validation and inspection results are submitted for permission to continue production and distribution.                                                                         | 0.81-1.97 | 0.81-1.97   | Interview |
| <b>Total</b>                    |                                                                                                                                                                                                                                                                        | 1.46-3.09 | 18.60-20.23 |           |
| <b>Duration (years)</b>         |                                                                                                                                                                                                                                                                        | 7         | 11          | Interview |

194 Investments in the development of new drugs from existing chemical entities incur high  
195 costs. The feasibility analysis considers the costs of drug formulation development and expresses  
196 them as the income that entrepreneurs should generate to achieve the capitalization point. The  
197 feasibility results indicate that, for the base case analysis with an expected payback period of 5  
198 years, the income required to cover the invested capital ranges from 0.20 to 1.80 million USD for  
199 the scenario conducting only Phase I, and 3.01 to 27.11 million USD for the full clinical trial  
200 scenario (Table 3).

201 Furthermore, with a longer duration of R&D in both scenarios, the annual income that  
202 investors must generate will be higher compared with shorter time periods, indicating a higher  
203 level of investment. Therefore, if entrepreneurs can expedite the R&D process, they can save  
204 investment costs and increase the feasibility of developing these drugs. In cases where  
205 formulation and analytical method development carry a high risk of failure and involve  
206 numerous areas of development, including more sophisticated clinical studies, investing in R&D  
207 processes may require higher capital investment, and investors need to generate higher income to  
208 achieve a higher capitalization point.

209 Considering the payback period for investors, longer payback periods tend to result in a  
210 lower capitalization point, requiring lower annual income generation by operators, compared to  
211 shorter payback periods. If a drug has a longer lifecycle and does not require frequent  
212 development, such as drugs for chronic diseases, a longer acceptable payback period may be  
213 applicable.(10) Various factors, including the annual sales growth rate, marketability upon  
214 launch, number of competitors, and government policies, influence feasibility assessment.

215 **Table 3** The feasibility study results of this study show in terms of income that  
216 investors should be able to achieve in order to achieve capital gains.

|                                             | <b>Scenario 1 (Million USD)</b> | <b>Scenario 2 (Million USD)</b> |
|---------------------------------------------|---------------------------------|---------------------------------|
| <b>Payback period</b>                       |                                 |                                 |
| <b>5 years payback period</b>               | 0.20-1.80*                      | 3.01-27.11**                    |
| <b>10 years payback period</b>              | 0.04-1.20                       | 0.63-17.87                      |
| <b>Duration of research and development</b> |                                 |                                 |
| <b>Scenario 1</b>                           |                                 |                                 |
| <b>5 years</b>                              | 0.18-1.66                       |                                 |
| <b>10 years</b>                             | 0.26-2.33                       |                                 |
| <b>Scenario 2</b>                           |                                 |                                 |
| <b>10 years</b>                             | 2.85-25.63                      |                                 |
| <b>15 years</b>                             | 4.19-37.73                      |                                 |

217 \* The parameters of scenario 1 base case analysis are that the duration of research and development is 7 years,  
218 and the research and development cost is 1.46 million USD.

219 \*\* The parameters of scenario 2 base case analysis are that the duration of research and development is 11  
220 years, and the research and development cost is 18.60 million USD

221

## 222 Discussion

223 This study conducted a financial feasibility analysis, specifically focusing on sustained-  
224 release dosage forms, which differ from other financial models. The analysis estimated four key  
225 constructs: the total cost of IMD development, expected payback period, expected growth rate,  
226 and expected revenue that investors could potentially earn to cover the break-even point or  
227 generate profit. However, these dosage forms may vary in their active ingredients, making it  
228 challenging to estimate sales revenue and market growth without precise information regarding  
229 the specific active ingredients being developed for the studied drug form. The methodology  
230 chosen in this study is suitable for analyzing the financial aspects of new drugs or innovations  
231 despite limited data availability. To strengthen the reliability of the limited data, the triangulation  
232 method was employed, enhancing the validity and credibility of the findings.

233 The findings from each scenario indicate that investments in IMDs are relatively high and  
234 require a longer development duration than new generic drugs. A major portion of these  
235 investments is attributed to conducting clinical studies for registration, drug selection, and the  
236 sufficiency of presented data to confirm efficacy and safety. Financial feasibility considerations  
237 are also influenced by an entrepreneur's capacity to invest and generate income.

238 This study identifies key factors that can potentially affect investors' decision-making  
239 processes. First, clinical studies play a crucial role in drug development and contribute  
240 significantly to the overall cost. Challenges, such as limited clinical data from reference products  
241 and complexities associated with different types of IMDs, along with drug properties, such as  
242 pharmacodynamics, pharmacokinetics, and toxicity, can drive the investment required for this  
243 phase. Consequently, this cost burden can impact investors' decisions and hinder the  
244 development of new drugs in the domestic pharmaceutical industry. When it is not feasible to

245 bridge clinical study data from a previous product to support the development of a new drug,  
246 conducting a clinical study becomes imperative.(9) Offering incentives and support to conduct  
247 clinical studies, particularly for IMDs, can alleviate the financial burden on pharmaceutical  
248 companies. These incentives may include grants, tax benefits, or expedited regulatory processes.  
249 In such cases, an alternative strategy could involve considering clinical trials in countries with  
250 high overall attractiveness indices(11). In doing so, the aim is to expedite the drug's path to the  
251 market, ultimately accelerating the return on investment and potentially gaining a competitive  
252 edge over other market players.

253         Second, the development of IMDs in domestic industry is still relatively new, resulting in  
254 longer development times and increased costs. One key factor contributing to this extended  
255 duration is the limited knowledge and expertise within the domestic industry and related  
256 organizations. Additionally, the conducting of clinical trials and challenges in the registration  
257 system can add to the overall time required for the development of an IMDs. To mitigate these  
258 challenges and shorten the duration of development, it is essential to focus on building capacity  
259 among all stakeholders involved in the process by establishing comprehensive capacity-building  
260 programs to enhance expertise within the domestic pharmaceutical industry and related  
261 organizations. These programs should focus on improving proficiency in the R&D processes,  
262 conducting efficient clinical trials, and navigating regulatory procedures. By implementing such  
263 initiatives, the duration of the IMDs development can be reduced, resulting in cost savings.  
264 Furthermore, it is crucial to recognize that the R&D process for IMDs should commence early  
265 during the originator-branded product lifecycle. Since IMDs development can be time-  
266 consuming, starting the R&D process early ensures sufficient time for thorough research, testing,  
267 and regulatory processes.

268 Third, owing to the high investment required to reach the capital break-even point and  
269 generate profits, entrepreneurs need to consider market feasibility and potential sales  
270 opportunities for IMDs. The presence of generic and new generic drugs as competitors in the  
271 market increases the complexity. To promote the adoption of IMDs, the government and  
272 associated organizations can play a role by proposing supportive policies as well as supporting  
273 export policies to expand market opportunities. Collaborative efforts involving the public and  
274 private sectors are crucial for sustainable development of the domestic pharmaceutical industry.

275 Fourth, the process of selecting suitable drugs for IMDs development involves careful  
276 consideration of various factors including financial aspects, patient needs, scientific and  
277 technological feasibility, and legal and registration feasibilities. It is crucial to acknowledge that  
278 not every drug can be formulated in every dosage form, which makes the drug selection process  
279 a significant factor that influences investment decisions. Several key elements are involved in  
280 drug selection. Market competitors and the expected payback period that the pharmaceutical  
281 industry can accept play crucial roles in determining the feasibility of drugs for IMD  
282 development. For instance, drugs such as antibiotics may require shorter payback periods owing  
283 to the potential emergence of drug resistance, whereas drugs used to treat chronic diseases or  
284 orphan drugs may require longer payback periods. In this context, selecting drugs with longer  
285 lifecycles and those that already possess sufficient existing data for bridging may be more  
286 feasible investment options. These drugs are more likely to have sustainable market demand and  
287 provide a higher chance of success in the development process.

288 By adopting and implementing these policy recommendations, the government and  
289 associated organizations can establish an enabling environment for the development of IMDs,



290 foster innovation, reduce costs, and ensure long-term sustainability of the domestic  
291 pharmaceutical industry.

## 292 **Conclusions**

293 This study provides crucial insights into the financial feasibility of developing sustained  
294 release dosage forms for IMDs in the Thai pharmaceutical industry. The proposed policy  
295 recommendations aim to create an enabling environment for IMDs development, ultimately  
296 fostering innovation and ensuring the sustainability of the domestic pharmaceutical industry.

## 297 **Acknowledgements**

298 The authors would like to express my sincere gratitude to the Thai Pharmaceutical  
299 Manufacturers Association (TPMA) for their excellent collaboration, which allowed us to  
300 conduct interviews and gather valuable data for the assessment. Our deepest appreciation goes  
301 to all the participants who generously gave their time and contributed to this study. Their active  
302 participation and valuable insights greatly enriched our research.

## 303 **References**

- 304 1. Secretariat of the National Strategy Committee. The National strategy of THAILAND  
305 (2018 - 2037) 2016;4.
- 306 2. National drug system development committee. national drug policy 2011 and national  
307 drug system development strategy 2011-2016. 2011.
- 308 3. Committee on Thai drug system. Thai drug system 2020. Health system research  
309 institute2020.

- 310 4. Sakulbumrungsil R, Kessomboon N, Udomaksorn K, Poonpolsub S, Nerapusee O,  
311 Hongthong C, et al. Feasibility Study of Dosage Form Drug Development for Incrementally  
312 Modified by Domestic Pharmaceutical Industry. 2022.
- 313 5. Hongthong C, Sakulbumrungsil R, Udomaksorn K, Poonpolsub S, Nerapusee O,  
314 Laichapis M, et al. Feasibility study of sustained release dosage forms for incrementally  
315 modified drug by domestics pharmaceutical industry in Thailand [version 1; peer review:  
316 awaiting peer review]. F1000Research. 2023;12(1513).
- 317 6. Liangrokapart J, Kessomboon N, Sakulbumrungsil R, Akaleephan C, Poonpolsub S,  
318 Saerekul P. Impact of Thai-EU Free Trade Agreement (FTA) concerning Intellectual Property  
319 Rights on the Pharmaceutical Supply Chain in Thailand. 2013.
- 320 7. Tamplin T. Classification of Cost [https://learn.financestrategists.com/explanation/cost-](https://learn.financestrategists.com/explanation/cost-accounting/analysis-of-cost/classification-of-cost/)  
321 [accounting/analysis-of-cost/classification-of-cost/](https://learn.financestrategists.com/explanation/cost-accounting/analysis-of-cost/classification-of-cost/): finance strategists; 2021.
- 322 8. E-finance management. Classification of Costs based on Functions / Activities  
323 [https://efinancemanagement.com/costing-terms/classification-of-costs-based-on-functions-](https://efinancemanagement.com/costing-terms/classification-of-costs-based-on-functions-activities2021)  
324 [activities2021](https://efinancemanagement.com/costing-terms/classification-of-costs-based-on-functions-activities2021) .
- 325 9. Thai food and drug administration. Guideline for nonclinical and clinical evaluations of  
326 new drug products from previously approved drug substances. In: Bureau D, editor. 2019.
- 327 10. Teramae F, Makino T, Sengoku S, Lim Y, Natori T, Kodama K. Research on  
328 Pharmaceutical Product Life Cycle Patterns for Sustainable Growth. Sustainability.  
329 2020;12(21):8938.
- 330 11. Bailey W, Cruickshank C, Sharma N. Make your move: taking clinical trials to the best  
331 location.

332 12. Jiang J, Kong J. how did the public U.S. drugmakers' sales, expenses and profit change  
333 over time ? : USC Leonard D. Schaeffer Center for Health Policy & Economics; 2021 [Available  
334 from: [https://healthpolicy.usc.edu/evidence-base/how-did-the-public-u-s-drugmakers-sales-  
335 expenses-and-profits-change-over-time/](https://healthpolicy.usc.edu/evidence-base/how-did-the-public-u-s-drugmakers-sales-expenses-and-profits-change-over-time/).

336 13. Haacker M, Hallett TB, Atun R. On discount rates for economic evaluations in global  
337 health. Health Policy Plan. 2020;35(1):107-14.

338 14. Department of industries ministry of economic affairs royal government of Bhutan.  
339 Feasibility analysis of drug formulation. IDRG consultancy services; 2009.

340 15. National Institute on Aging. What Are Clinical Trials and Studies? : National Institute on  
341 Aging; 2023 [Available from: [https://www.nia.nih.gov/health/what-are-clinical-trials-and-  
342 studies#:~:text=Clinical%20trials%20are%20research%20studies,safe%20and%20effective%20i  
343 n%20people](https://www.nia.nih.gov/health/what-are-clinical-trials-and-studies#:~:text=Clinical%20trials%20are%20research%20studies,safe%20and%20effective%20in%20people).

344

345

346

347

348
